# Supplementary material
Source: PubMed Central journal article supplement (PMC6773560)
Supplement: 153441_2_supp_381447_pw2kdc.pdf [file 153441_2_supp_381447_pw2kdc.pdf]

Supplementary Information Yang et al.

**Multidimensional proteomics identifies declines in protein homeostasis and mitochondria as early signals for normal aging and age-associated disease in *Drosophila***

Lu Yang<sup>a,b,#</sup>, Ye Cao<sup>a,b,#</sup>, Jing Zhao<sup>a,b</sup>, Yanshan Fang<sup>a</sup>, Nan Liu<sup>a,\*</sup>, Yaoyang Zhang<sup>a,\*</sup>

<sup>a</sup>Interdisciplinary Research Center on Biology and Chemistry, Shanghai Institute of Organic Chemistry, Chinese Academy of Sciences, 26 Qiuyue Rd., Pudong, Shanghai, 201210, China

<sup>b</sup>University of Chinese Academy of Sciences, Beijing, 100049, China

<sup>#</sup>These authors contributed equally to this work.

\* Correspondence: [liunan@sioc.ac.cn](mailto:liunan@sioc.ac.cn) (N.L), [zyy@sioc.ac.cn](mailto:zyy@sioc.ac.cn) (Y.Z)

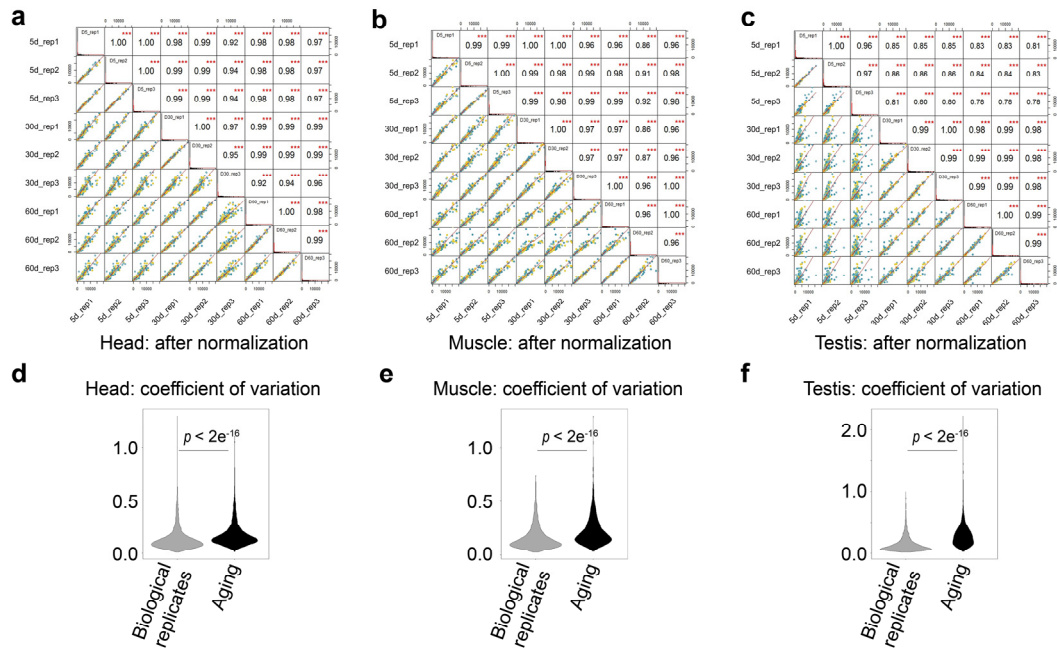

**Supplementary Fig. 1** Data reproducibility and comparison between biological replicates of 10-plex TMT quantification of head, muscle and testis tissues in flies. **a-c** Correlation between quantitative proteomic analyses. Data derived from three biological replicates and three aging time points were plotted for each tissue. **d-f** Coefficients of variation (CVs) between different biological replicates or different aging samples in head, muscle and testis.

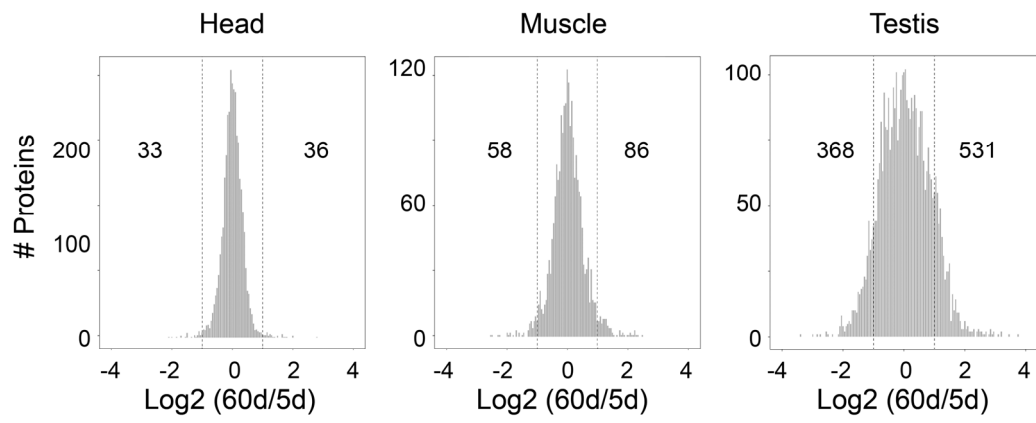

**Supplementary Fig. 2** Distributions of the protein abundance ratios between 5d and 60d of fly head, muscle and testis tissues.

# WT\_pSILAC

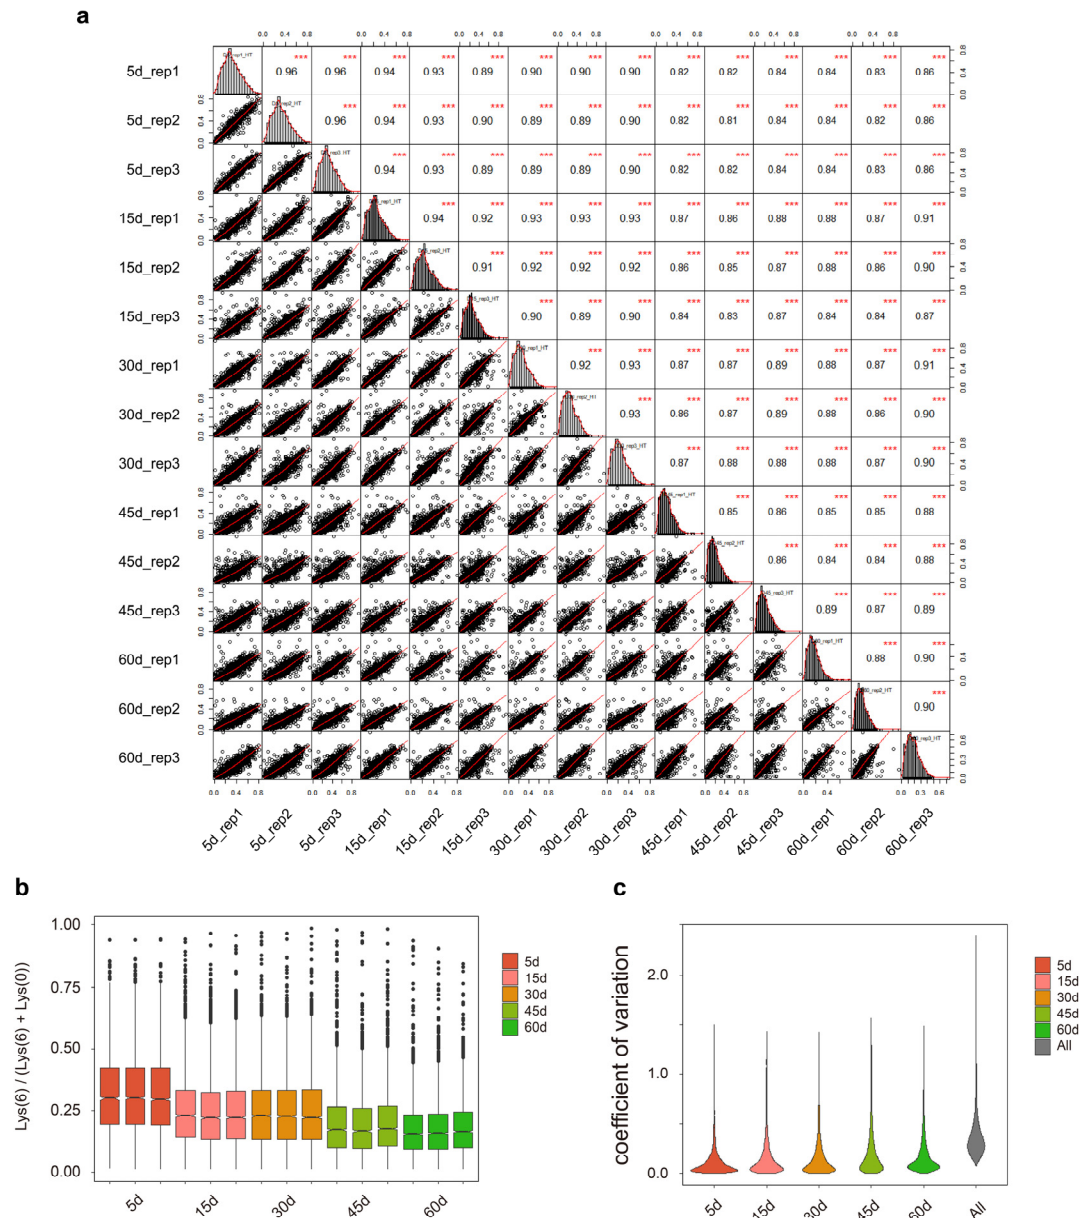

**Supplementary Fig. 3** Data reproducibility and comparison between biological replicates of pulsed-SILAC quantification of wild-type fly heads. **a** Correlation between pulsed-SILAC proteomic analyses. Data derived from three biological replicates and different time points were plotted. **b** Pulsed-SILAC data of three biological replicates. **c** Coefficients of variation (CVs) between different biological replicates for different aging samples in wild-type fly heads.

## *Pink1*<sup>B9</sup>\_pSILAC

**a**

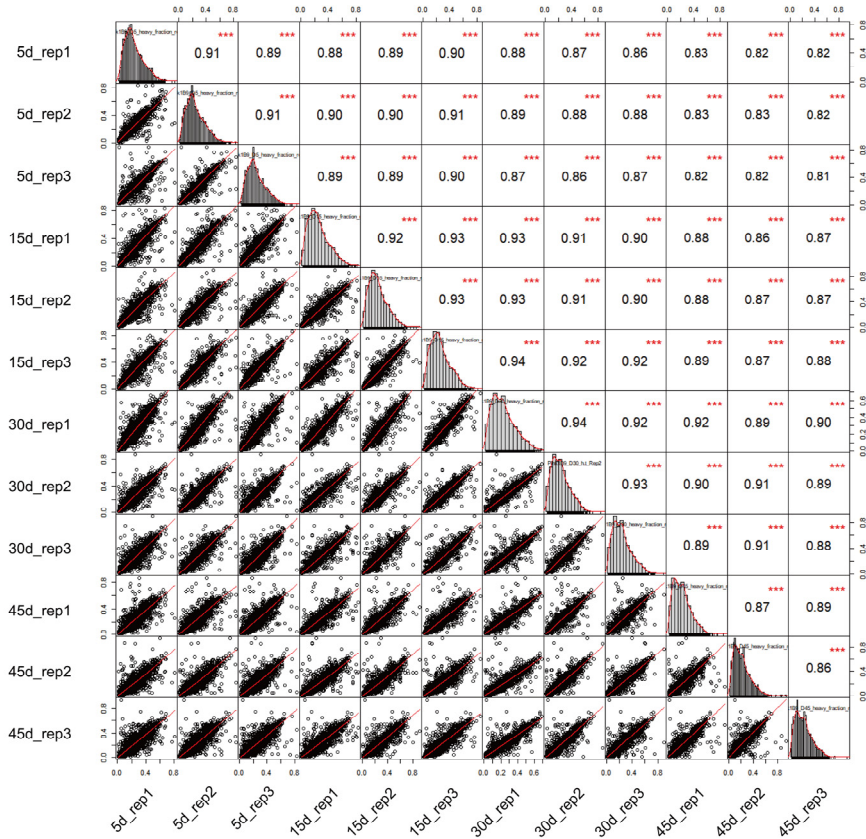

**b**

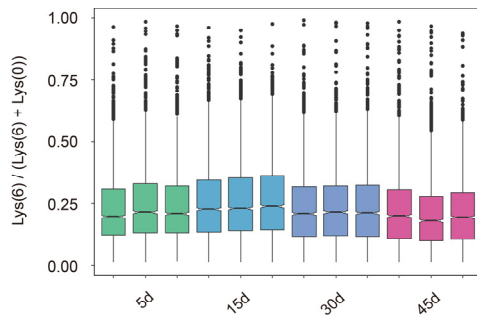

**c**

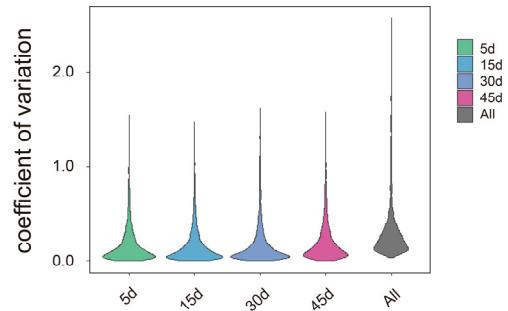

**Supplementary Fig. 4** Data reproducibility and comparison between biological replicates of pulsed-SILAC quantification of *Pink1*<sup>B9</sup> mutant fly heads. **a** Correlation between pulsed-SILAC proteomic analyses. Data derived from three biological replicates and different time points were plotted. **b** Pulsed-SILAC data of three biological replicates. **c** Coefficients of variation (CVs) between different biological replicates for different aging samples in *Pink1*<sup>B9</sup> mutant fly heads.

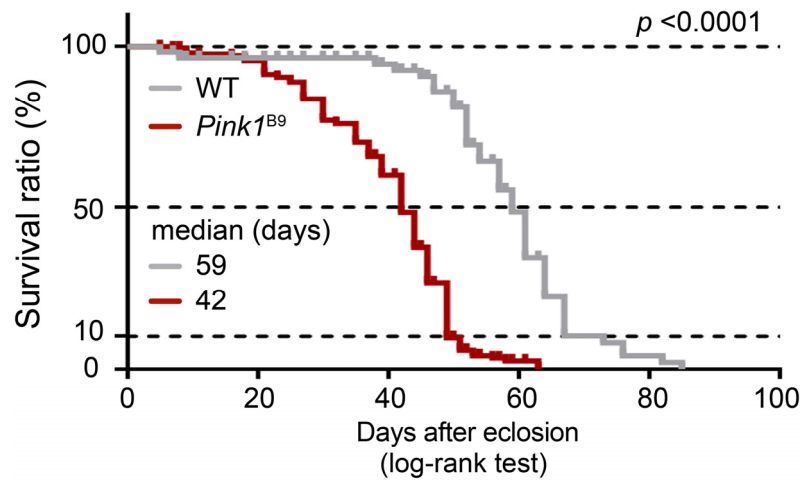

**Supplementary Fig. 5** Lifespan analysis of wild-type and *Pink1<sup>B9</sup>* mutant flies during the normal aging process.
